# Supplementary material for: MF–NF Treatment Train for Pig Manure: Nutrient Recovery and Reuse of Product Water
Source: Membranes (Basel). 2022 Jan 30;12(2):165. doi: 10.3390/membranes12020165 (PMC8875562; doi:10.3390/membranes12020165)
Supplement: Supplementary file 1 [file membranes-12-00165-s001.zip › membranes-1566439-supplementary.pdf]

## Supporting information

### MF-NF treatment train for pig manure: Nutrient recovery and reuse of product water

Prantik Samanta<sup>a,b</sup>, Hannah Marie Schönettin<sup>b</sup>, Harald Horn<sup>a,b</sup>, Florencia Saravia<sup>a</sup>

<sup>a</sup> DVGW-Research Center at the Engler-Bunte-Institut, Water Chemistry and Water Technology, Karlsruhe Institute of Technology, Engler-Bunte-Ring 9, 76131, Karlsruhe, Germany

<sup>b</sup> Karlsruhe Institute of Technology, Engler-Bunte-Institut, Water Chemistry and Water Technology, Engler-Bunte-Ring 9, 76131, Karlsruhe, Germany

#### 1. Membrane filtration system

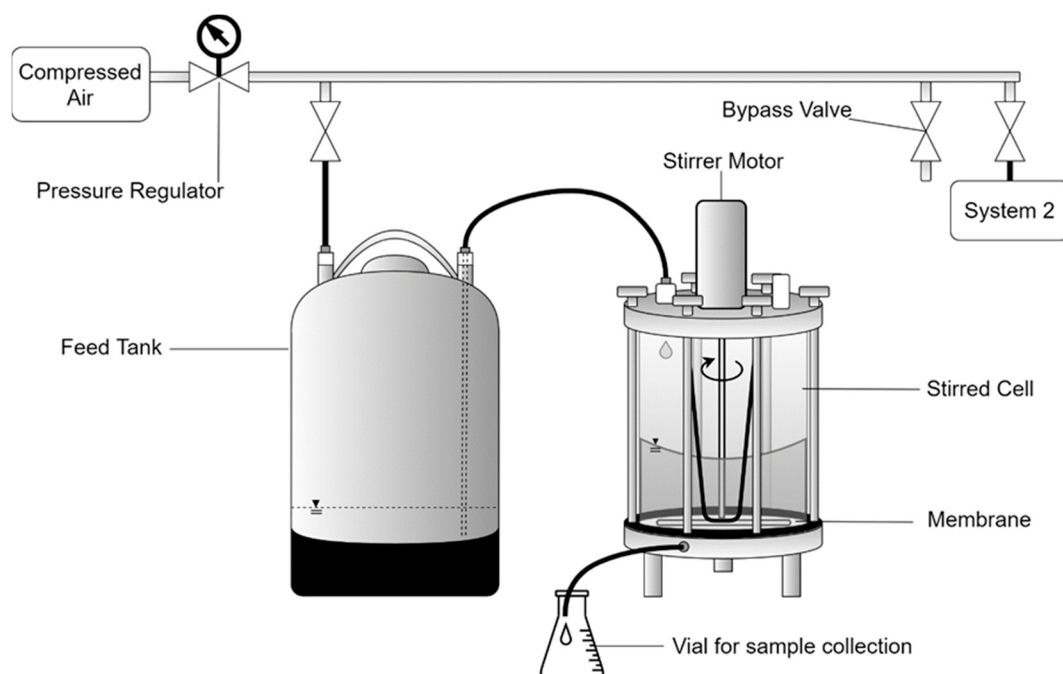

**Figure S1.** Stirred cell dead end membrane filtration system

## 2. Ion retention

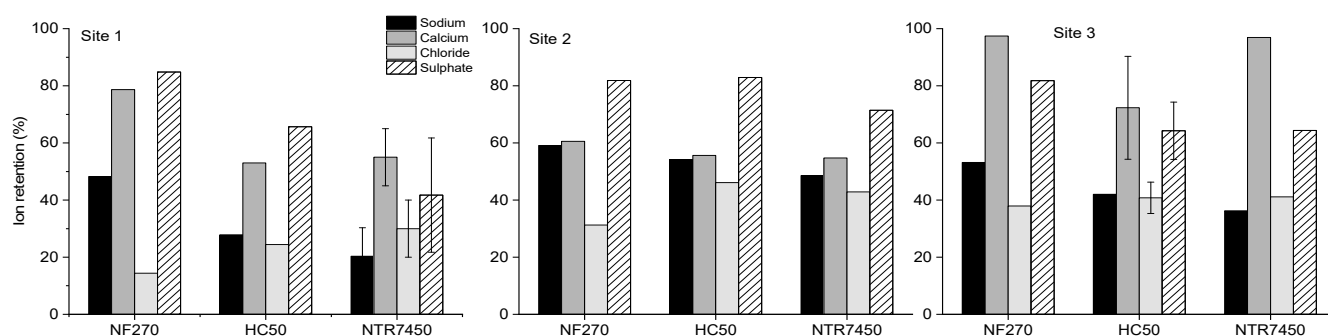

**Figure S2.** Ion retention of MF permeate at 50% recovery by NF270, HC50 and NTR7450 membranes from all sampling sites. Pressure: 6.5 bar, stirring rate: 400 rpm, temperature: 25°C.

## 3. COD and DOC retention by NF

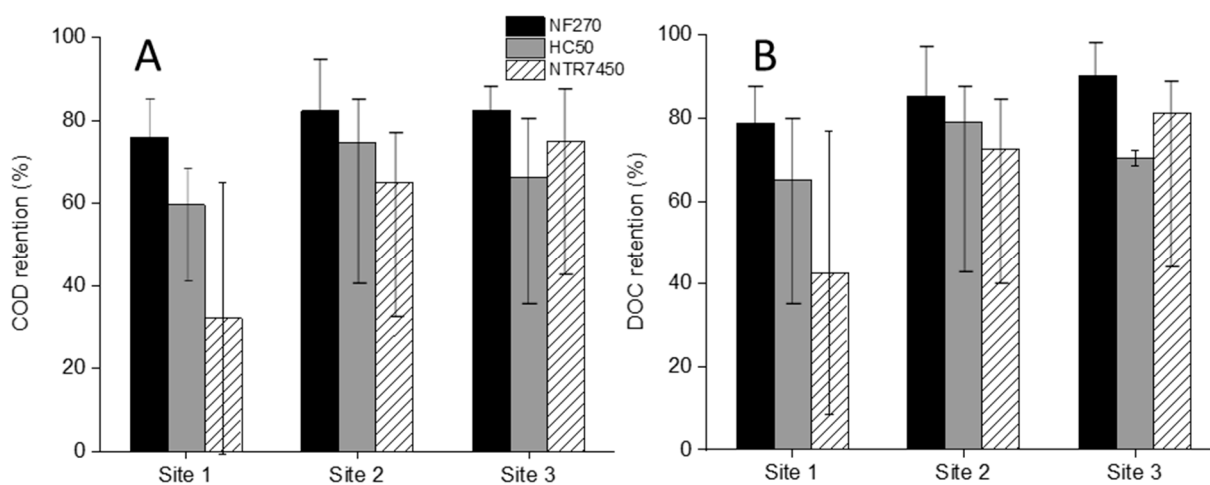

**Figure S3.** (A) COD and (B) DOC retention of MF permeate at 50% recovery by NF270, HC50 and NTR7450 membranes from all sampling sites. Pressure: 6.5 bar, stirring rate: 400 rpm, temperature: 25°C.

#### 4. Normalized flux during filtration

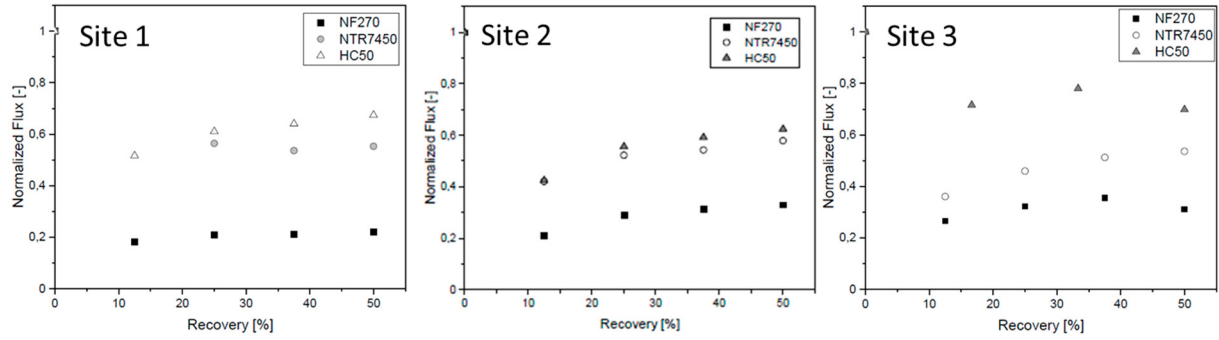

**Figure S4.** Flux during filtrations of NF270, HC50 and NTR7450 membranes while filtering pig manure from all sampling sites. Pressure: 6.5 bar, stirring rate: 400 rpm, temperature: 25°C.

Normalized flux was calculated by following equation S1, where  $J_w$  is pure water flux before MF permeate filtration and  $J_p$  is the flux during MF permeate filtration.

$$\text{Normalized flux} = (J_p/J_w) \quad (S1)$$
